# Supplementary material for: ZnO nanoparticle-decorated two-dimensional titanium carbide with enhanced supercapacitive performance
Source: Royal Society of Chemistry journal article supplement (doi:10.1039/c6ra15384d), 2016-01-01
Supplement: c6ra15384d1.pdf [file c6ra15384d1.pdf]

## Supporting Information

**ZnO nanoparticles decorated two-dimensional titanium carbide  
with enhanced supercapacitive performance**

Fen Wang<sup>a</sup>,, Minjuan Cao<sup>a</sup>, Yi Qin<sup>a</sup>, Jianfeng Zhu<sup>a</sup>, Lei Wang<sup>a</sup>, Yi Tang<sup>a</sup>

<sup>a</sup>School of Materials Science and Engineering, Shaanxi University of Science and Technology,

Xi'an 710021, People's Republic of China

Author to whom correspondence should be addressed;

E-mail addresses: [wangf@sust.edu.cn](mailto:wangf@sust.edu.cn)

## **Supplementary methods:**

### 1. Synthesis of $\text{Ti}_3\text{AlC}_2$

Ball milling TiC, Ti, Al powders in a molar ratio of 1:1:1.2 in ethanol for 4 h and dried at 50 °C for 48 h. The mixture was sintered in 1350 °C for 2 h with the vacuum pressless sintering method. The sintered product was high-energy ball milled in ethanol for 2 h, and then sifted out through a sieve (200 meshes) and dried at 50 °C for 24 h.

### 2. Synthesis of $\text{Ti}_3\text{C}_2$

Put 5 g as-synthesized  $\text{Ti}_3\text{AlC}_2$  powder in 80 ml of 40% HF solution at room temperature for 24 h. Then the resulting suspension was washed using deionized water until the pH value reached around 5 and centrifuged to separate the powders. Finally the left powder was dried at 40° C for 24 h.

**Figure Captions:**

Fig. S1. XRD patterns of  $\text{Ti}_3\text{AlC}_2$  and  $\text{Ti}_3\text{C}_2$ .

Fig. S2. XRD patterns of ZnO.

Fig. S3. SEM image of  $\text{Ti}_3\text{AlC}_2$ .

Fig. S4. SEM image of ZnO.

Fig. S5. Digital photographs of the thin film produced by rolling (a), the flexibility of the film is demonstrated (b), SEM images of fracture surface of the thin film ( $\sim 20 \mu\text{m}$ ) (c-d).

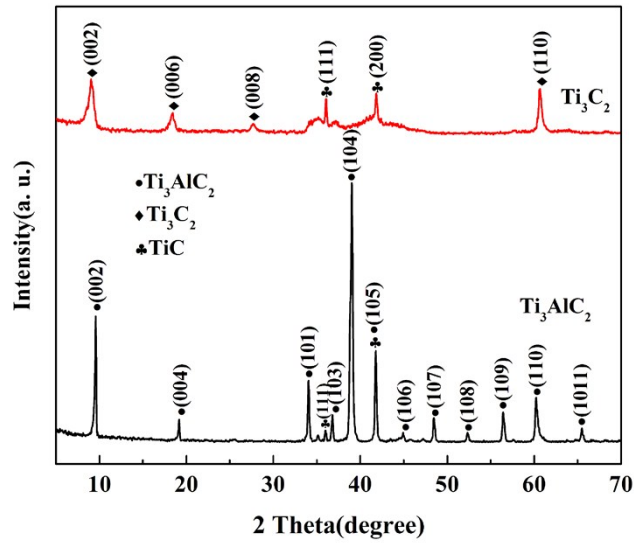

Fig. S1. XRD patterns of  $\text{Ti}_3\text{AlC}_2$  and  $\text{Ti}_3\text{C}_2$ .

It is clear that the (101) peaks of  $\text{Ti}_3\text{AlC}_2$ , such as (103), (104), (105), (106), (107), (108) and (109), disappeared, indicating the “Al” layer was etched out from the ternary layered structure. The (002) peak broadened and shifted to a lower angle, suggesting a lower crystallinity of  $\text{Ti}_3\text{C}_2$ .

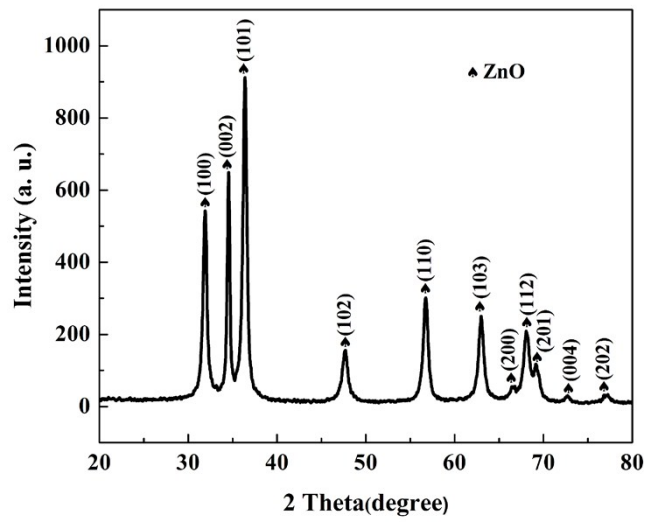

Fig. S2. XRD patterns of ZnO.

All of the diffraction peaks observed agree well with the hexagonal wurtzite ZnO (JCPDS36-1451).

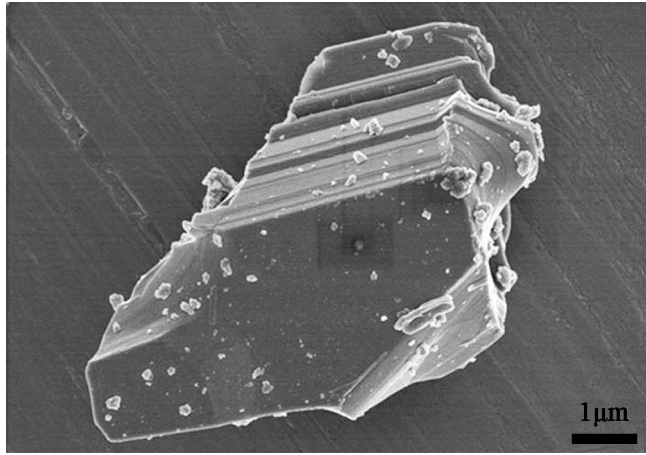

Fig. S3. SEM image of Ti<sub>3</sub>AlC<sub>2</sub>.

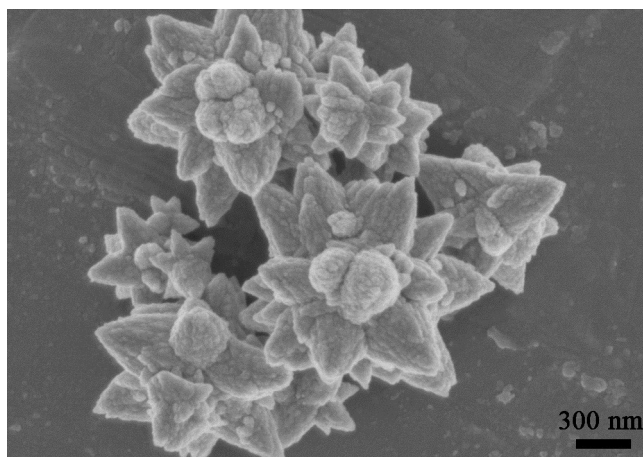

Fig. S4. SEM image of ZnO.

It can be clearly seen that the ZnO nanoparticles aggregated and formed flower-shaped architecture, implying that the existence of  $\text{Ti}_3\text{C}_2$  sheets can prevent the aggregation of ZnO nanoparticles effectively.

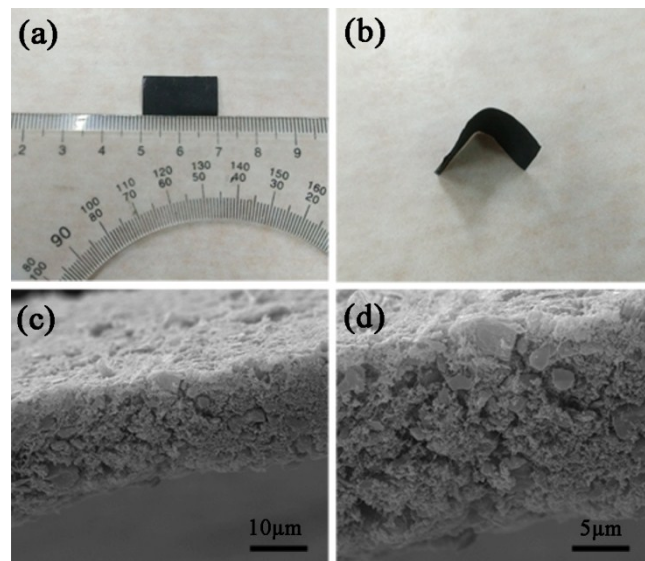

Fig. S5. Digital photographs of the thin film produced by rolling (a), the flexibility of the film is demonstrated (b), SEM images of a fracture surface of the thin film ( $\sim 20 \mu\text{m}$ ) (c-d).
